# Supplementary material
Source: PubMed Central journal article supplement (PMC11029138)
Supplement: 262_2016_1856_MOESM1_ESM.pdf [file 262_2016_1856_MOESM1_ESM.pdf]

**Supplementary table 1: Key parameters of the ECT procedure**

| <b>Parameter</b>                                                                          | <b>Description</b>                                                                                                                                                                                         |
|-------------------------------------------------------------------------------------------|------------------------------------------------------------------------------------------------------------------------------------------------------------------------------------------------------------|
| <b>Adherence to standard operating procedure</b>                                          | All cases were performed in concordance with the ESOPE 2006 guidelines, following the operating procedures "local anesthesia - intratumoral chemotherapy" or "general sedation - intravenous chemotherapy" |
| <b>Anesthesia</b>                                                                         |                                                                                                                                                                                                            |
| General / sedation                                                                        | 32 (97.0%)                                                                                                                                                                                                 |
| Local anesthesia only                                                                     | 1 (3.0%)                                                                                                                                                                                                   |
| <b>Drug</b>                                                                               | Bleomycin (all cases)                                                                                                                                                                                      |
| <b>Administration of bleomycin</b>                                                        |                                                                                                                                                                                                            |
| Intravenous                                                                               | 32 (97.0%)                                                                                                                                                                                                 |
| Intratumoral                                                                              | 1 (3.0%)                                                                                                                                                                                                   |
| <b>Dose</b>                                                                               |                                                                                                                                                                                                            |
| Intravenous                                                                               | 15 000 IU/m <sup>2</sup> body surface area                                                                                                                                                                 |
| Intratumoral                                                                              | 250-500 IU/cm <sup>3</sup> tumour tissue                                                                                                                                                                   |
| <b>Concentration of bleomycin</b>                                                         |                                                                                                                                                                                                            |
| Intravenous                                                                               | 0,5-3 mg/ml diluted in 0,9% NaCl                                                                                                                                                                           |
| Intratumoral                                                                              | 1000 IU/ml dissolved in sterile water                                                                                                                                                                      |
| <b>Duration of infusion</b> (if given intravenously)                                      | 30-60 seconds                                                                                                                                                                                              |
| <b>Interval of application of electric pulses after infusion</b> (if given intravenously) | 8-28 minutes                                                                                                                                                                                               |
| <b>Premedication</b>                                                                      | None                                                                                                                                                                                                       |
| <b>Pulse generator</b>                                                                    |                                                                                                                                                                                                            |
| Cliniporator™                                                                             | 32 (97.0%)                                                                                                                                                                                                 |
| Sennex®                                                                                   | 1 (3.0%)                                                                                                                                                                                                   |
| <b>Electrical parameters</b>                                                              |                                                                                                                                                                                                            |
| Total number of applied pulses                                                            | 58 (range 1-625)                                                                                                                                                                                           |
| Voltage amplitude                                                                         | 730-1000 V (high voltage)                                                                                                                                                                                  |
| Duration of pulses                                                                        | 100 µs                                                                                                                                                                                                     |
| Pulse repetition frequency                                                                | 1000-5000 Hz                                                                                                                                                                                               |
| Measured current                                                                          | Max. 20 Ampère                                                                                                                                                                                             |
| <b>Median number of treated lesions</b>                                                   | 4 (range 1-100)                                                                                                                                                                                            |
| <b>Median size of largest tumor nodule</b>                                                | 2 cm (range 1-20 cm)                                                                                                                                                                                       |
